# Supplementary material for: pHmScarlet is a pH-sensitive red fluorescent protein to monitor exocytosis docking and fusion steps
Source: PubMed Central journal article supplement (PMC7930027; doi:10.1038/s41467-021-21666-7), 2021-03-03
Supplement: 41467_2021_21666_MOESM6_ESM.pdf [file 41467_2021_21666_MOESM6_ESM.pdf]

## Description of Additional Supplementary Files

**Title:** Supplementary Movie 1

**Description:** Continuous imaging of vesicle fusion labeled by VAMP2-pHmSarlet in an INS-1 cell corresponding to Fig. 4a.

**Title:** Supplementary Movie 2

**Description:** Continuous imaging of vesicle fusion labeled by VAMP2-pHmSarlet in a HT-22 mouse hippocampal neuronal cell corresponding to Fig. 4h.
